# Supplementary material for: A family of complexes with N-scorpionate-type and other N-donor ligands obtained in situ from pyrazole derivative and zerovalent cobalt. Physicochemical and cytotoxicity studies
Source: Royal Society of Chemistry journal article supplement (doi:10.1039/c6ra06439f), 2016-01-01
Supplement: c6ra06439f1.pdf [file c6ra06439f1.pdf]

Table S1. Selected hydrogen bonds parameters (Å, deg) for [CoL<sup>1</sup>Br][ZnL<sup>3</sup>(μ-uro)ZnBr<sub>5</sub>] (**1**), [CoL<sup>1</sup>Cl][ZnL<sup>3</sup>Br<sub>3</sub>] (**2**) and [CoL<sup>1</sup>Cl][ZnL<sup>3</sup>Cl<sub>3</sub>] (**3**).

| <i>D</i> —H··· <i>A</i>       | <i>D</i> —H (Å) | H··· <i>A</i> (Å) | <i>D</i> ··· <i>A</i> (Å) | <i>D</i> —H··· <i>A</i> (°) |
|-------------------------------|-----------------|-------------------|---------------------------|-----------------------------|
| <b>1</b>                      |                 |                   |                           |                             |
| C18—H18B···Br1 <sup>i</sup>   | 0.97            | 2.89              | 3.610 (8)                 | 132.1                       |
| C27—H27A···Br5 <sup>i</sup>   | 0.96            | 2.74              | 3.545 (11)                | 141.5                       |
| C51—H51A···Br6 <sup>i</sup>   | 0.97            | 2.71              | 3.611 (9)                 | 154.6                       |
| C46—H46A···Br2 <sup>i</sup>   | 0.96            | 2.90              | 3.696 (12)                | 140.5                       |
| C17—H17C···Br4 <sup>ii</sup>  | 0.96            | 2.74              | 3.632 (9)                 | 155.2                       |
| C26—H26C···Br5                | 0.96            | 2.93              | 3.750 (10)                | 143.7                       |
| <b>2</b>                      |                 |                   |                           |                             |
| C16—H16A···Cl1                | 0.96            | 2.69              | 3.528 (14)                | 146.2                       |
| C26—H26A···Cl1                | 0.96            | 2.70              | 3.448 (18)                | 135.1                       |
| C36—H36A···Cl1                | 0.96            | 2.55              | 3.458 (17)                | 157.7                       |
| C14—H14···Cl1 <sup>iv</sup>   | 0.93            | 2.68              | 3.600 (11)                | 169.1                       |
| C18—H18A···Br2                | 0.97            | 2.89              | 3.657 (8)                 | 136.5                       |
| C18—H18B···Br2 <sup>v</sup>   | 0.97            | 2.88              | 3.821 (9)                 | 163.6                       |
| C27—H27B···Br3 <sup>v</sup>   | 0.96            | 3.01              | 3.831 (12)                | 143.8                       |
| C28—H28B···Br3 <sup>v</sup>   | 0.97            | 2.89              | 3.739 (8)                 | 147.0                       |
| C38—H38A···Br3 <sup>v</sup>   | 0.97            | 2.94              | 3.385 (8)                 | 109.0                       |
| N42—H42···Br4 <sup>vi</sup>   | 0.86            | 3.04              | 3.745 (6)                 | 141.2                       |
| C46—H46C···Br3 <sup>vii</sup> | 0.96            | 3.16              | 3.537 (10)                | 105.2                       |
| C47—H47A···Br4 <sup>vi</sup>  | 0.96            | 3.12              | 3.644 (11)                | 116.0                       |
| <b>3</b>                      |                 |                   |                           |                             |
| C16—H16A···Cl1                | 0.96            | 2.73              | 3.488 (5)                 | 136.3                       |
| C26—H26B···Cl1                | 0.96            | 2.52              | 3.437 (5)                 | 159.5                       |
| C36—H36C···Cl1                | 0.96            | 2.61              | 3.452 (5)                 | 146.7                       |
| C14—H14···Cl1 <sup>iv</sup>   | 0.93            | 2.73              | 3.610 (3)                 | 159.1                       |
| C18—H18A···Cl2                | 0.97            | 2.80              | 3.571 (3)                 | 136.9                       |
| C18—H18B···Cl2 <sup>v</sup>   | 0.97            | 2.77              | 3.708 (3)                 | 163.4                       |
| C27—H27A···Cl3 <sup>v</sup>   | 0.96            | 2.90              | 3.747 (4)                 | 148.0                       |
| C28—H28B···Cl3 <sup>v</sup>   | 0.97            | 2.77              | 3.624 (3)                 | 146.7                       |
| C38—H38B···Cl3 <sup>v</sup>   | 0.97            | 2.87              | 3.309 (3)                 | 108.7                       |
| N42—H42···Cl4 <sup>vi</sup>   | 0.86            | 2.68              | 3.426 (2)                 | 145.4                       |
| C46—H46C···Cl3 <sup>vii</sup> | 0.96            | 2.69              | 3.521 (4)                 | 145.6                       |
| C47—H47A···Cl4 <sup>vi</sup>  | 0.96            | 2.79              | 3.542 (4)                 | 135.5                       |

Symmetry codes: (i)  $x+1, y, z$ ; (ii)  $x+1, -y+1/2, z+1/2$ ; (iii)  $x, -y+1/2, z-1/2$ ; (iv)  $-x+1, y-1/2, -z+1/2$ ; (v)  $-x, -y, -z$ ; (vi)  $-x, y-1/2, -z+1/2$ ; (vii)  $-x, y+1/2, -z+1/2$ .

Table S2. Thermal decomposition of **1-3** complexes in air atmosphere

| Decomposition                                                                                              | Stage | TG (°C) | $\Delta m_{\text{exp}}$ (%) | $\Delta m_{\text{calc}}$ (%) |
|------------------------------------------------------------------------------------------------------------|-------|---------|-----------------------------|------------------------------|
| [CoL <sup>1</sup> Br][ZnBr <sub>3</sub> (L <sup>2</sup> )ZnBr <sub>2</sub> (L <sup>3</sup> )] ( <b>1</b> ) |       |         |                             |                              |
| ↓<br>{C <sub>6</sub> N <sub>2</sub> H <sub>12</sub> (L <sup>2</sup> )}                                     | I     | 160-300 | 9,55                        | 8,99                         |
| [CoL <sup>1</sup> Br] [ZnBr <sub>3</sub> N <sub>2</sub> ZnBr <sub>2</sub> (L <sup>3</sup> )]               |       |         |                             |                              |
| ↓<br>- 6{Br}                                                                                               | II    | 300-480 | 35,50                       | 38,70                        |
| [CoL <sup>1</sup> ] [ZnN <sub>2</sub> Zn(L <sup>3</sup> )]                                                 |       |         |                             |                              |
| ↓<br>-(C <sub>5</sub> NH <sub>8</sub> ) (L <sup>3</sup> )                                                  | III   | 480-680 | 27,88                       | 29,30                        |
| ↓<br>-0.75 L <sup>1</sup>                                                                                  |       |         |                             |                              |
| ↓<br>A                                                                                                     | IV    | 680-900 | 19.42                       | 20.77                        |
| Residue ZnCo <sub>2</sub> O <sub>4</sub> + ZnO                                                             |       |         |                             |                              |
| [CoL <sup>1</sup> Cl][ZnL <sup>3</sup> Br <sub>3</sub> ] ( <b>2</b> )                                      |       |         |                             |                              |
| ↓<br>- {Br}                                                                                                | I     | 160-390 | 9.95                        | 9.53                         |
| {Co(L <sup>1</sup> )Br} { ZnL <sup>3</sup> Br <sub>2</sub> }                                               |       |         |                             |                              |
| ↓<br>- {C <sub>18</sub> H <sub>27</sub> N <sub>7</sub> (L <sup>1</sup> )}                                  | II    | 390-990 | 75.47                       | 75.60                        |
| ↓<br>- {C <sub>5</sub> NH <sub>8</sub> } (L <sup>3</sup> )}                                                |       |         |                             |                              |
| ↓<br>- {Cl, 2Br}                                                                                           |       |         |                             |                              |
| Residue {Co <sub>3</sub> O <sub>4</sub> + ZnO}                                                             |       |         |                             |                              |
| [CoL <sup>1</sup> Cl][ZnL <sup>3</sup> Cl <sub>3</sub> ] ( <b>3</b> )                                      |       |         |                             |                              |
| ↓<br>- . {C <sub>18</sub> H <sub>27</sub> N <sub>7</sub> (L <sup>1</sup> )}                                | I     | 190-480 | 52.96                       | 53.61                        |
| ↓<br>- {Cl}                                                                                                |       |         |                             |                              |
| {Co} {ZnL <sup>3</sup> Cl <sub>3</sub> }                                                                   |       |         |                             |                              |
| ↓<br>- . {C <sub>5</sub> H <sub>8</sub> N} (L <sup>3</sup> )}                                              | II    | 480-970 | 25.91                       | 26.71                        |
| Residue (Co <sub>2</sub> O <sub>3</sub> , ZnO)                                                             |       |         |                             |                              |
